# Supplementary material
Source: PubMed Central journal article supplement (PMC10330046)
Supplement: NIHMS1887691-supplement-1.pdf [file NIHMS1887691-supplement-1.pdf]

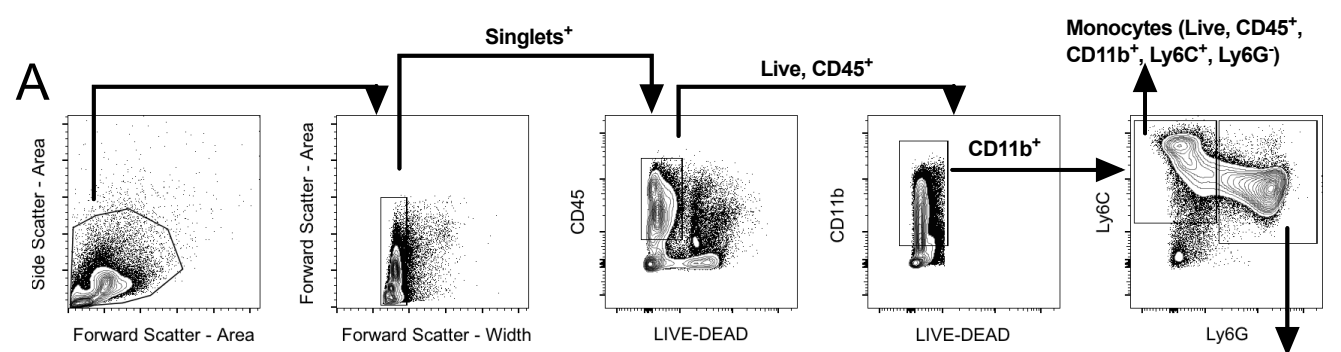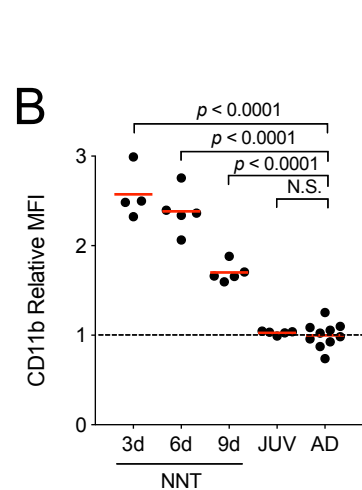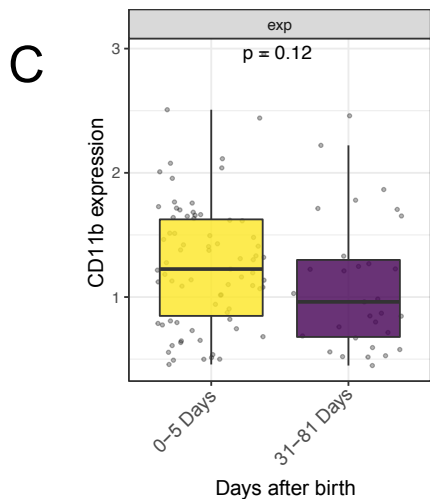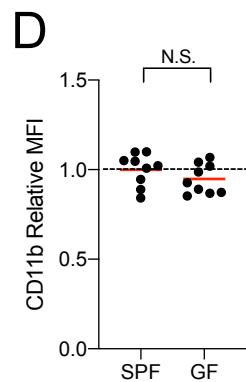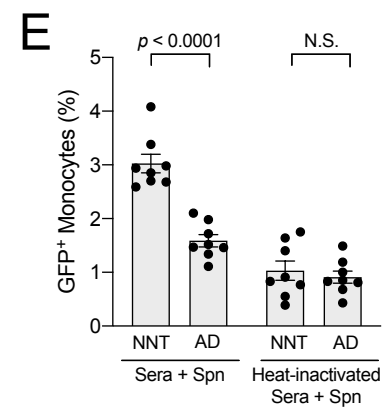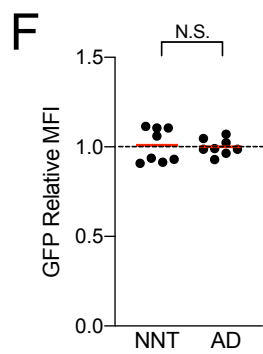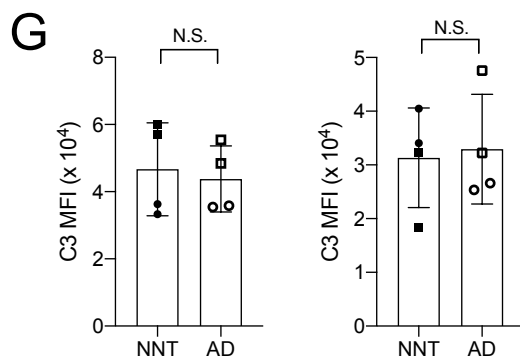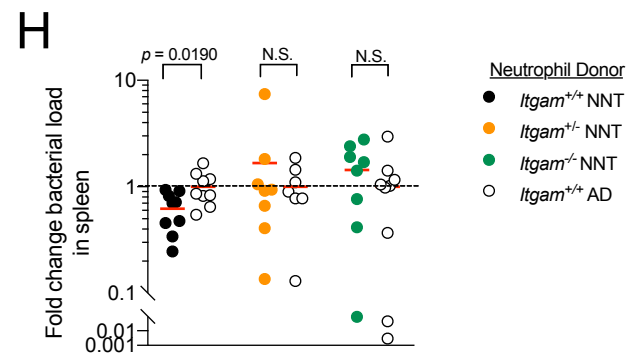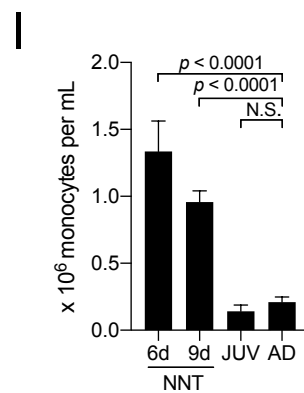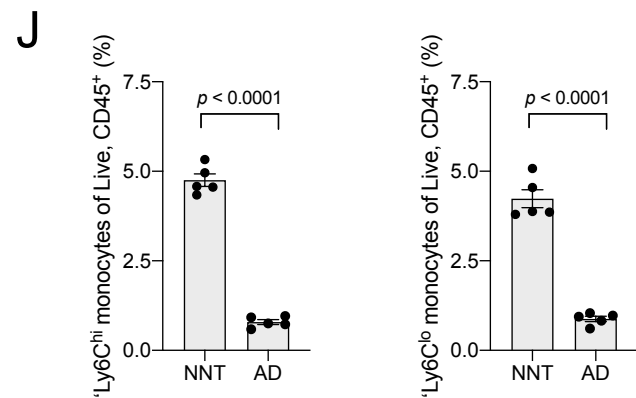

Supplementary Figure 1 – Related to Figures 2 and 4: **Extended phenotypic and functional analyses of neonatal myeloid cells.**

[A] Gating strategy for phenotyping of myeloid cells in mouse bone marrow.

[B] MFI of CD11b on bone marrow monocytes from mice at different ages [3 days old (3d), n = 4; 6 days old (6d), n = 5; 9 days old (9d), n = 5; JUV, n = 5; AD, n = 10].

[C] CD11b marker expression of monocytes from mass cytometry experiment comparing newborns aged 0-5 days (n = 75) and 31-81 days after birth (n = 31), mean expression from binned days used for coloring.

[D] MFI of CD11b on bone marrow neutrophils from neonatal mice housed in either germ-free or conventional, specific pathogen free facility (n = 9 for both groups).

[E] Opsonophagocytic uptake of mouse sera opsonized GFP-fluorescent Spn by monocytes from bone marrow suspensions of neonatal or adult mice at multiplicity of infection (MOI) of 25 (n = 8 for both groups).

[F] MFI of GFP signal on GFP<sup>+</sup> monocytes in [D].

[G] Deposition of complement C3 on Spn (left, serotype 4; right, serotype 23F) in 5-10% sera from NNT versus AD mice (n = 2 with 2 technical replicates marked by the same symbol).

[H] Recoverable live bacteria in spleen of *Cd11b*<sup>-/-</sup> recipients receiving either *Cd11b*<sup>+/+</sup> neonatal neutrophils (solid circle, n = 9), *Cd11b*<sup>+/-</sup> neonatal neutrophils (solid orange circles, n = 8) or *Cd11b*<sup>-/-</sup> neonatal neutrophils (solid green circle, n = 8) relative to that of recipients receiving *Cd11b*<sup>+/+</sup> adult neutrophils (open circle; n = 9, n = 9, n = 7, respectively) at 20 hours post infection with Spn via IP.

[I] Monocyte counts in peripheral blood from NNT (6d old, n = 7; 9d old, n = 10), JUV (n = 6) and AD (n = 11) mice.

[J] Frequency of Ly6C<sup>hi</sup> monocytes (left) and Ly6C<sup>lo</sup> monocytes (right) from spleen of NNT (n = 5) versus AD (n = 5) mice. Data with error bars are presented as mean ± SEM. N.S., not significant.

Live, CD45<sup>+</sup>CD11b<sup>+</sup> Ly6G<sup>+</sup>**A**Singlets<sup>+</sup>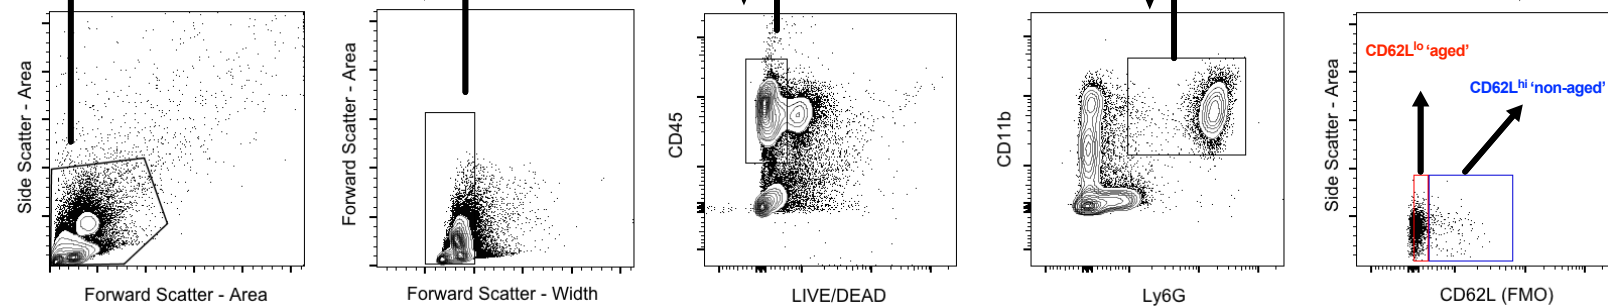**B**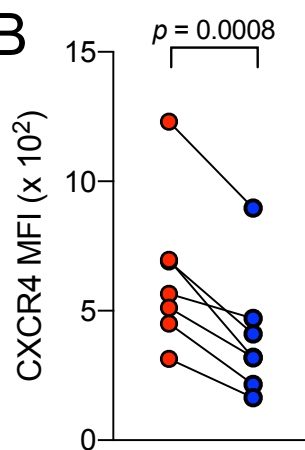**C**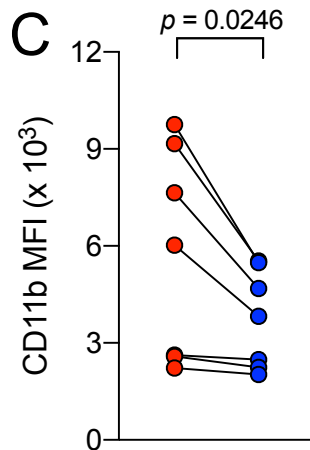**D**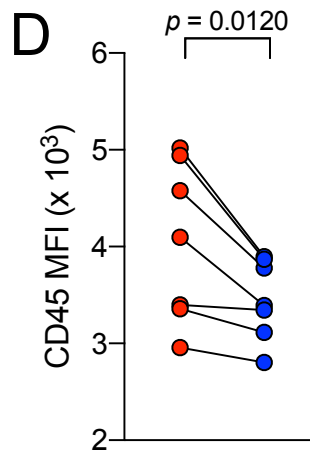

● CD62L<sup>lo</sup> 'aged'  
● CD62L<sup>hi</sup> 'non-aged'

**E**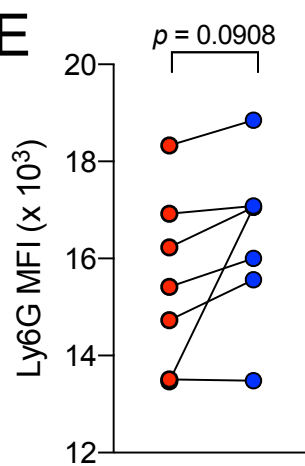**F**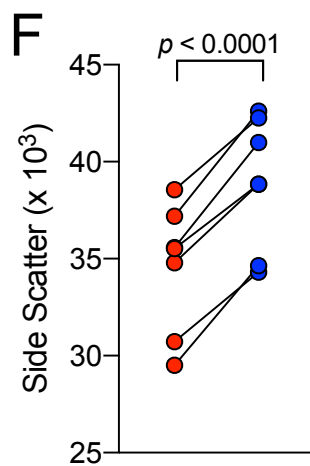**G**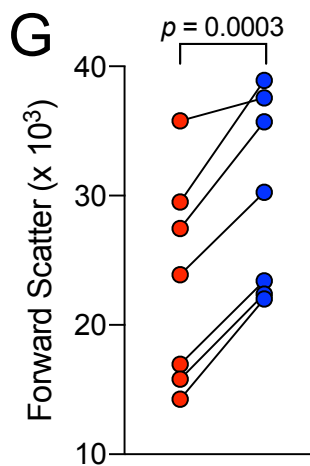

Supplementary Figure 2 - Related to Figure 3: **Assessment of surface markers associated with CD62L<sup>lo</sup> ‘aged’ neutrophils versus CD62L<sup>hi</sup> ‘non-aged’ neutrophils in adult peripheral blood.**

[A] Gating strategy for phenotyping of neutrophils in mouse blood.

[B-G] MFI analysis of known markers between CD62L<sup>lo</sup> ‘aged’ (red dots) and CD62L<sup>hi</sup> ‘non-aged’ (blue dots) neutrophils in adult blood (n = 7).

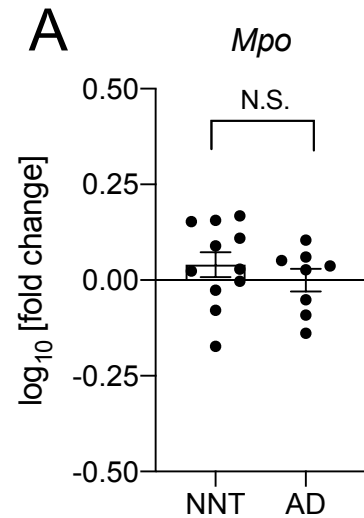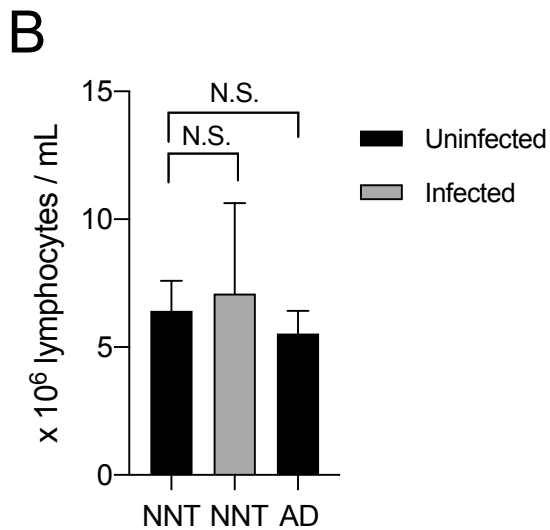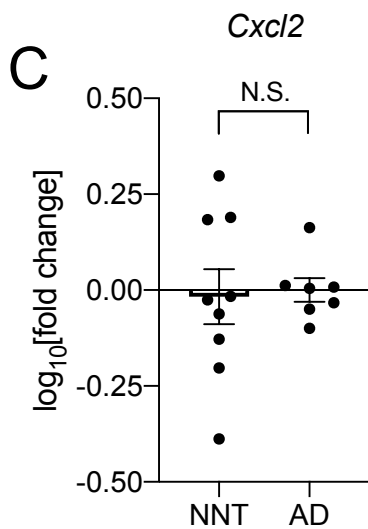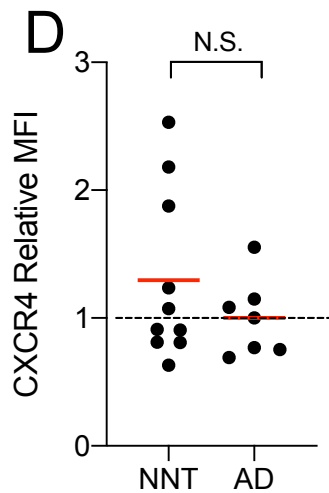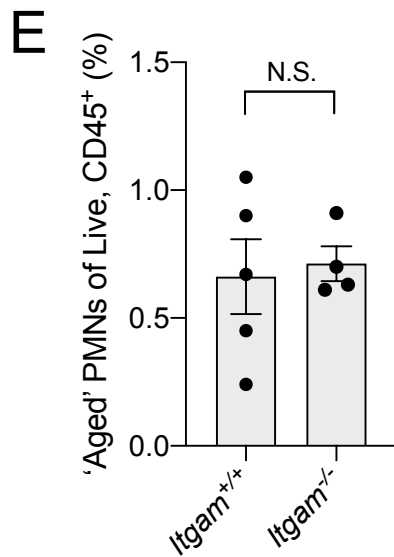

Supplementary Figure 3 – Related to Figure 4: **Bias of neonatal neutrophils toward an ‘aged’ phenotype is unlikely driven by lifespan shortening, intrinsic signaling pathways or CD11b expression itself.**

[A] RT-PCR analysis of myeloperoxidase (MPO) mRNA transcript in NNT (n = 11) versus AD (n = 8) neutrophils.

[B] Lymphocyte counts in peripheral blood from uninfected NNT mice (n = 5), NNT mice infected with Spn at 24 hpi (n = 4) and uninfected AD mice (n = 6).

[C] RT-PCR analysis of Cxcl2 mRNA transcript in NNT (n = 9) versus AD (n = 7) neutrophils.

[D] MFI of CXCR4 on peripheral blood neutrophils from NNT (n = 10) versus AD mice (n = 7).

[E] Frequency of CD62L<sup>lo</sup> ‘aged’ neutrophils from peripheral blood of *Cd11b*<sup>+/+</sup> AD mice (n = 5) versus *Cd11b*<sup>-/-</sup> AD mice (n = 4). Data with error bars are presented as mean ± SEM. N.S., not significant.

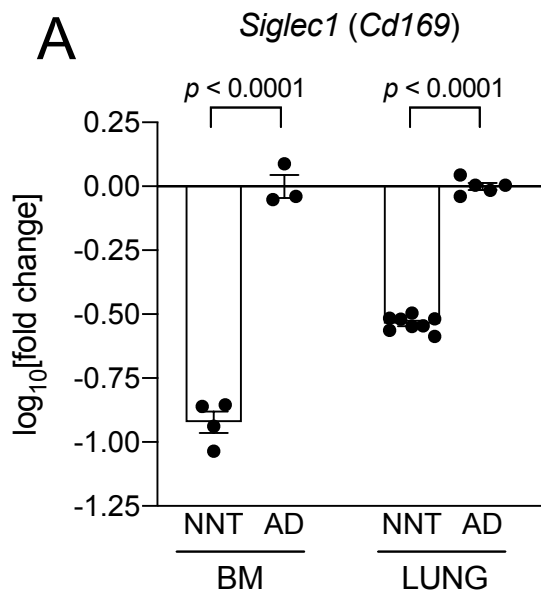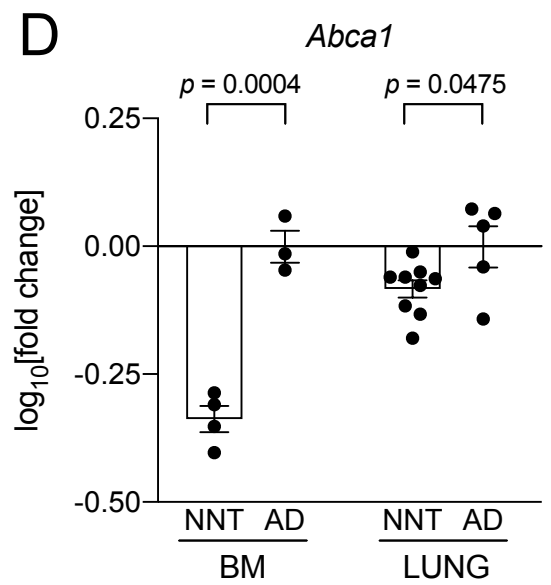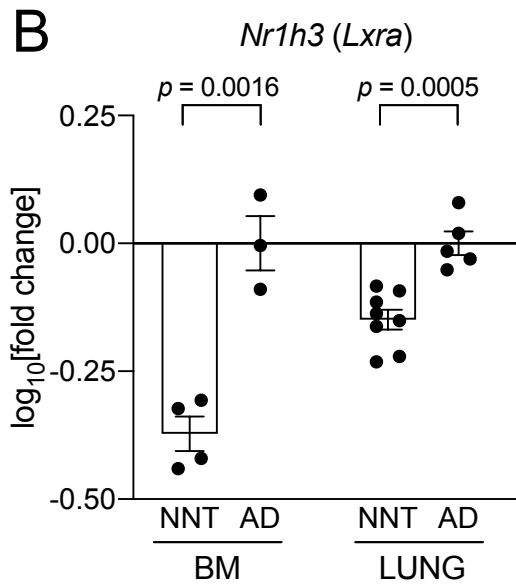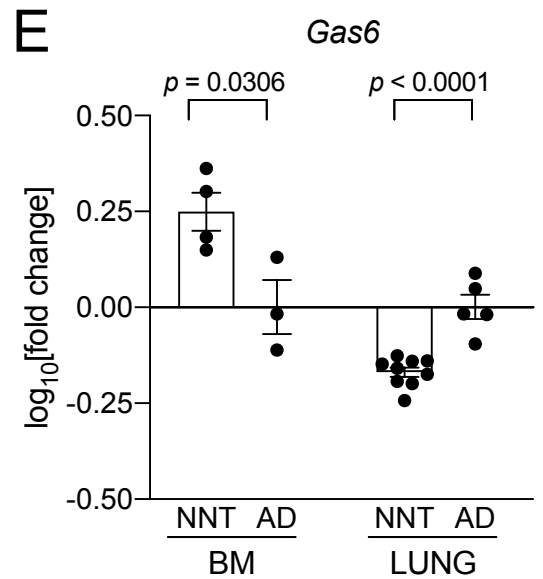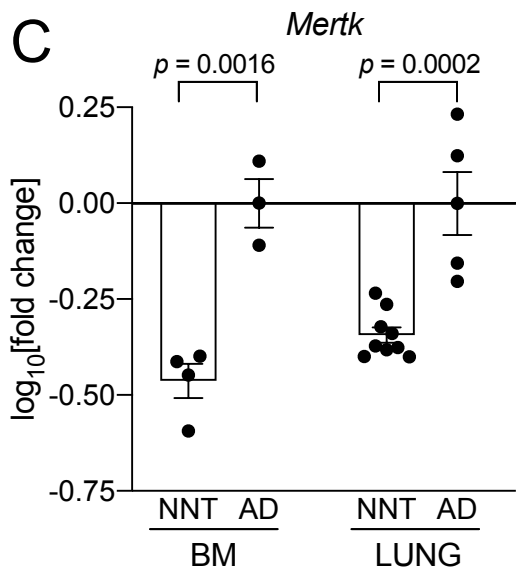

Supplementary Figure 4 – Related to Figure 4: **Transcriptional analysis of efferocytosis-associated markers in bone marrow and lung tissues.**

Bone marrow and lung expression of [A] *Cd169*, [B] *Lxra*, [C] *Mertk*, [D] *Abca1* and [E] *Gas6* in NNT (bone marrow, n = 4; lung, n = 8-9) versus AD (bone marrow, n = 3; lung, n = 5). Expression was calculated as fold change in NNT relative to AD. Data with error bars are presented as mean  $\pm$  SEM.



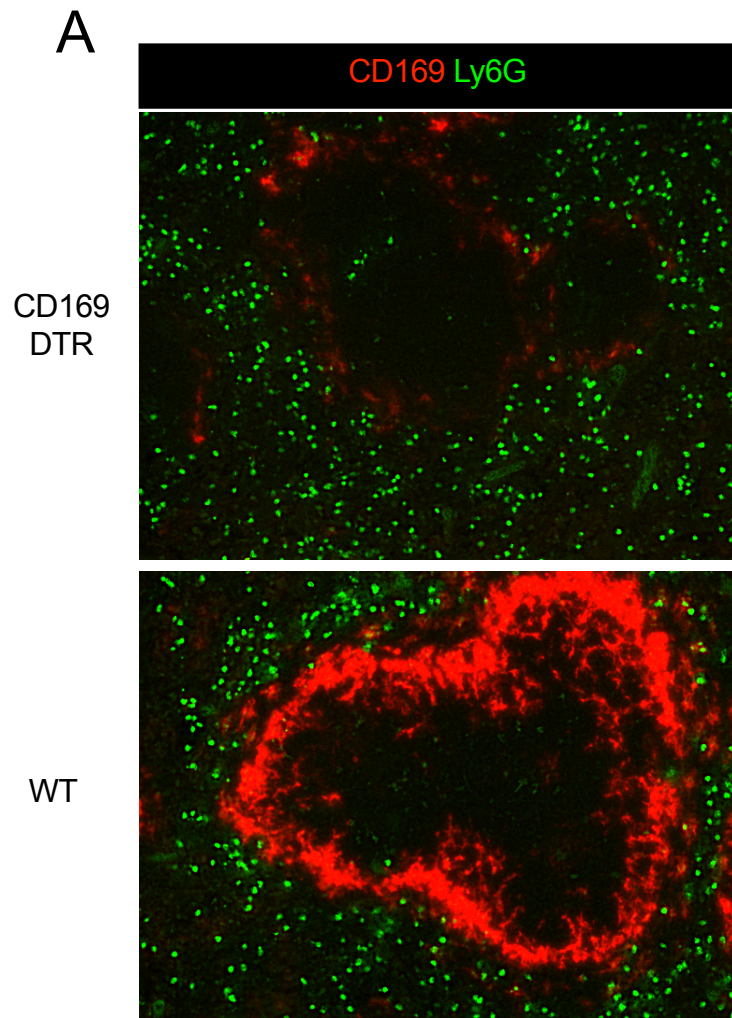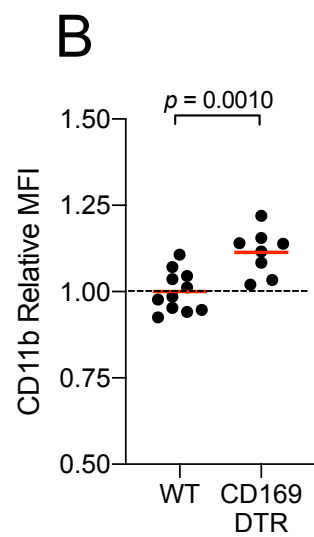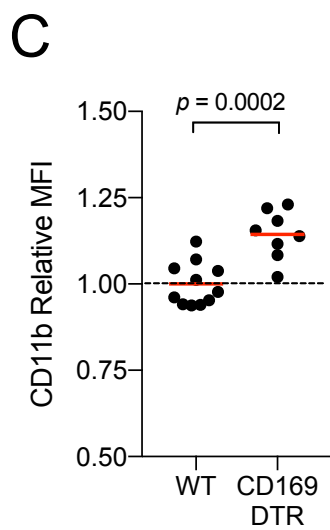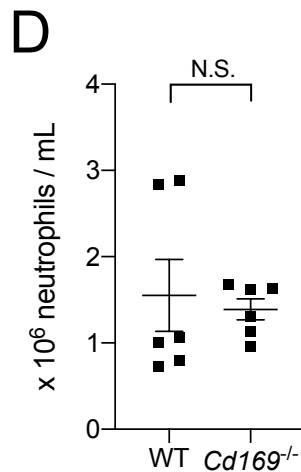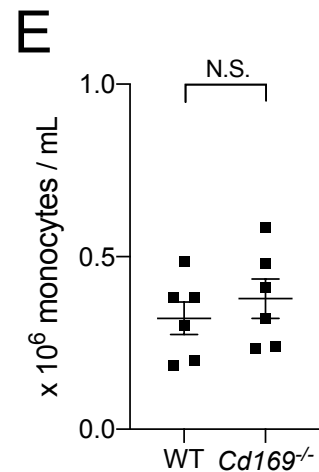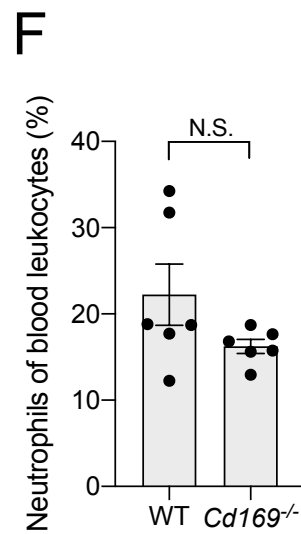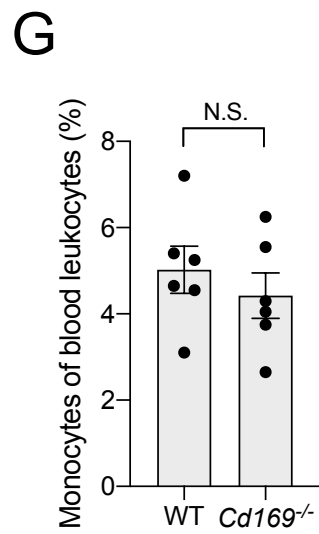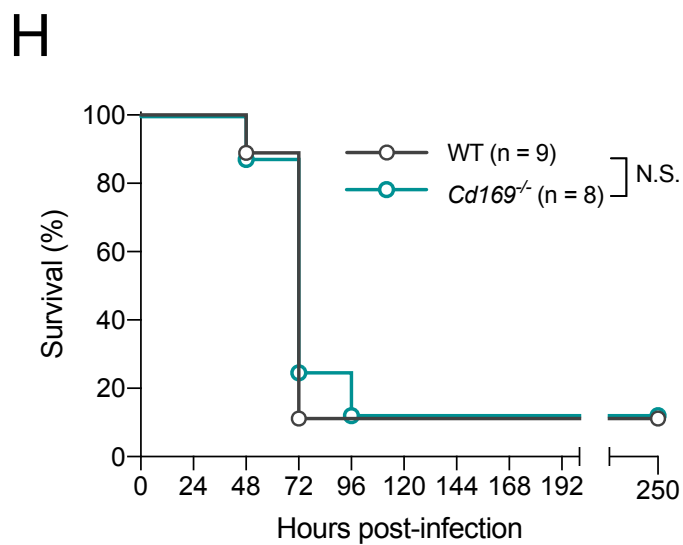

Supplementary Figure 5 – Related to Figure 5: **Extended phenotypic analyses of CD169-DTR and *Cd169*<sup>-/-</sup> adult mice.**

[A] Representative images of spleens from CD169-DTR and WT mice following DT administration as described in STAR Methods.

[B-C] MFI expression of CD11b on bone marrow Ly6C<sup>hi</sup> [B] and Ly6C<sup>lo</sup> [C] monocytes in WT (n = 11) versus CD169-DTR mice (n = 8).

[D-G] Absolute counts (neutrophils in [D], monocytes in [E]) or percentage population of all leukocytes (neutrophils in [F] monocytes in [G]) in blood from WT versus *Cd169*<sup>-/-</sup> adults (n = 6 for both groups).

[H] Survival of WT (open circle grey line, n = 9) versus *Cd169*<sup>-/-</sup> adults (open circle teal line, n = 8) following IP challenge with Spn. Data with error bars are presented as mean ± SEM. N.S., not significant.

**A**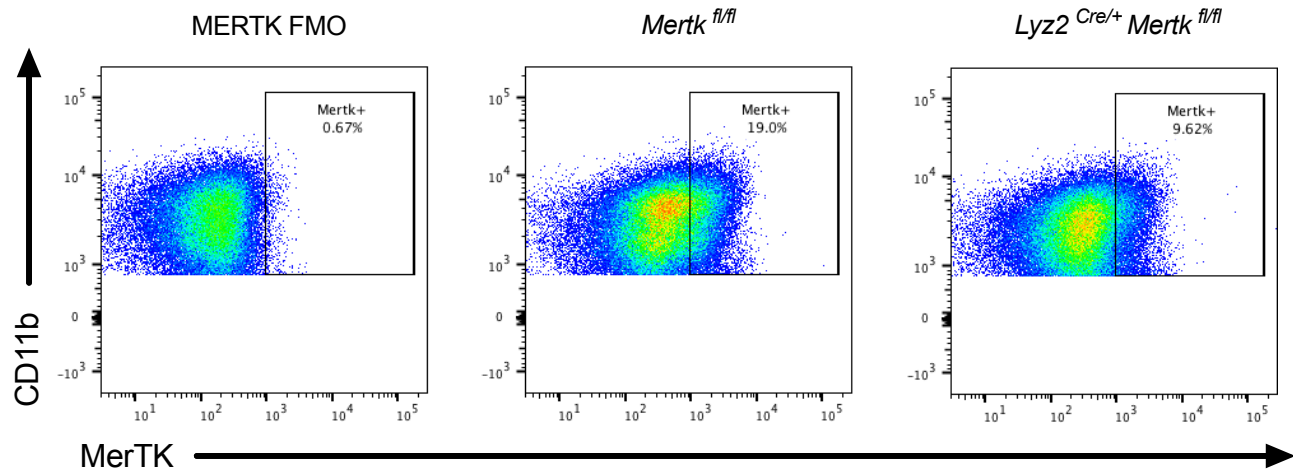**B**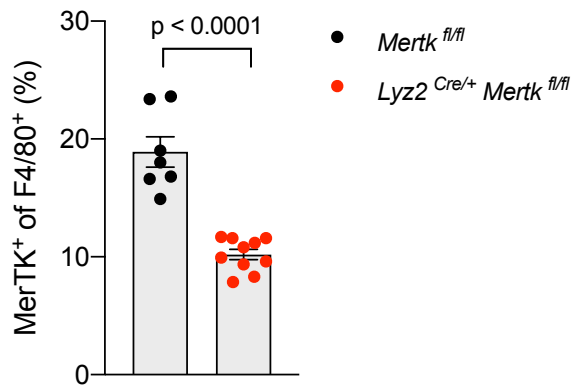

Supplementary Figure 6 – Related to Figure 5: **Assessment of MerTK expression on macrophages in the *Lyz2<sup>Cre/+</sup> Mertk<sup>fl/fl</sup>* conditional knockout mice.**

[A] Representative flow plots assessing frequency of MerTK-expressing cells as proportion of macrophages (gated on Live, Singlets, CD11b<sup>+</sup> F4/80<sup>+</sup>) from bone marrow of *Mertk<sup>fl/fl</sup>* versus *Lyz2<sup>Cre/+</sup> Mertk<sup>fl/fl</sup>* mice; FMO, fluorescence-minus-one control.

[B] Quantification of data described in [A] of *Mertk<sup>fl/fl</sup>* adult mice (n = 6) and *Lyz2<sup>Cre/+</sup> Mertk<sup>fl/fl</sup>* adult mice (n = 9). Data with error bars are presented as mean ± SEM.

Table S1 – Related to Figures 2 and 4: **List of mouse primer sequences used in this study**

| <b>Gene</b>                      | <b>Primer Sequence (5' – 3')</b>            |
|----------------------------------|---------------------------------------------|
| <i>Gapdh</i>                     | Forward: AGG TCG GTG TGA ACG GAT TTG        |
|                                  | Reverse: TGT AGA CCA TGT AGT TGA GGT CA     |
| <i>Itgam</i><br>( <i>Cd11b</i> ) | Forward: ATG GAC GCT GAT GGC AAT ACC        |
|                                  | Reverse: TCC CCA TTC ACG TCT CCC A          |
| <i>Cd169</i>                     | Forward: CTT GGG TCA GCC AAC AGT TC         |
|                                  | Reverse: GGT GAT GGT GAA ACC TGG AC         |
| <i>Lxra</i>                      | Forward: CAA CAG TGT AAC AGG CGC T          |
|                                  | Reverse: TGC AAT GGG CCA AGG C              |
| <i>Mertk</i>                     | Forward: GAG GAC TGC TTG GAT GAA CTG TA     |
|                                  | Reverse: AGG TGG GTC GAT CCA AGG            |
| <i>Abca1</i>                     | Forward: GGT TTG GAG ATG GTT ATA CAA TAG TT |
|                                  | Reverse: CCC GGA AAC GCA AGT CC             |
| <i>Gas6</i>                      | Forward: GGA TTT GCT ACC TAC AGG CTC A      |
|                                  | Reverse: TTA ACT TCC CAG GTG GTT TCC        |
| <i>Mpo</i>                       | Forward: GGA AGG AGA CCT AGA GGT TGG        |
|                                  | Reverse: TAG CAC AGG AAG GCC AAT G          |
| <i>Cxcl2</i>                     | Forward: CCA CCA ACC ACC AGG CTA C          |
|                                  | Reverse: GCT TCA GGG TCA AGG GCA AA         |
